# Supplementary material for: Multi-shell nanostructures minimize diffusion pathways and dual active sites decouple activation for efficient ammonia borane hydrolysis
Source: Royal Society of Chemistry journal article supplement (doi:10.1039/d5ta08596a), 2025-12-11
Supplement: d5ta08596a1.pdf [file d5ta08596a1.pdf]

# **Multi-shell Nanostructures Minimize Diffusion Pathways and Dual Active Sites Decouple Activation for Efficient Ammonia Borane Hydrolysis**

Lei Liu#, Zijian Zhou#, Ying Liu, Xin Yu\*, Dunxi Yu\*, Minghou Xu

State Key Laboratory of Coal Combustion, School of Power and Engineering, Huazhong University  
of Science and Technology, Wuhan 430074, China

\*Corresponding Author: [xinyu@hust.edu.cn](mailto:xinyu@hust.edu.cn) (Xin Yu); [yudunxi@hust.edu.cn](mailto:yudunxi@hust.edu.cn) (Dunxi Yu)

#These authors contributed equally.

## **This SM includes:**

- ◆ **Computational Details;**
- ◆ **Table S1 Specific surface area and pore volume of each catalyst;**
- ◆ **Fig. S1 Mean Squared Displacement (MSD) of H<sub>2</sub>O on Co<sub>3</sub>O<sub>4</sub> slab;**
- ◆ **Fig. S2 Mean Squared Displacement (MSD) of NH<sub>3</sub>BH<sub>3</sub> (AB) on Co<sub>3</sub>O<sub>4</sub> slab;**
- ◆ **Fig. S3. The crystal slabs of M<sub>3</sub>O<sub>4</sub> (M=Co, Zn, Ga, Cu, Ni, Fe and Mn) for H<sub>2</sub>O and NH<sub>3</sub>BH<sub>3</sub> (AB);**
- ◆ **Fig. S4 Mass change of catalyst precursors during the calcination process;**
- ◆ **Fig. S5. High-magnification SEM images of (a) CoCu-HS and (b) CoCu-SG. The statistical analysis of the particle size distribution for (c) CoCu-HS and (d) CoCu-SG.**
- ◆ **Fig. S6 SEM-EDS and HR-TEM of catalyst: Spherical morphology. (a) CoCu-HS, (b) CoNi-HS and (c) CoMn-HS. Lattice fringes (d) CoNi-HS, (e) CoZn-HS and (f) CoMn-HS.**
- ◆ **Fig. S7. Various shell thickness CoCu catalysts. (a-c)  $0.48\pm0.32\ \mu\text{m}$ , (d-f)  $1.07\pm0.26\ \mu\text{m}$  and (g-i)  $1.62\pm0.21\ \mu\text{m}$ .**
- ◆ **Fig. S8. Catalytic hydrolysis performance for various shell thickness CoCu catalysts: (a) H<sub>2</sub> production curve and (b) TOF value of hydrolyzed AB in 0.5mol/L NaOH at 25°C under the action of various catalysts;**
- ◆ **Fig. S9. H<sub>2</sub> production curve CoCu-HS with 2 mmol of AB dissolved in 1 mol/L NaOH aqueous solution (5 mL).**
- ◆ **Fig. S10 Pore structure for MCo-HS (M=Cu, Ni, Zn and Mn);**
- ◆ **Fig. S11 Pore structure for CuCo-HS and CuCo-SG;**
- ◆ **Fig. S12 XPS of (a) Co 2p spectrum and (b) Cu 2p spectrum.**
- ◆ **Fig. S13 Top view and side view of H<sub>2</sub>O and AB adsorption on Co<sub>3</sub>O<sub>4</sub> and CuCo-HS.**
- ◆ **Fig. S14 Influence of different proportions of Cu on Co<sub>3</sub>O<sub>4</sub> catalyst: (a) Phase compositions and (b) TOF values.**

## Computational Details

**Density Functional Theory (DFT) Structural Optimization:** The calculations were performed using with the DS-PAW method (HZWTECH, Shanghai, China). Pseudopotentials were utilized to describe the core electrons, and plane-wave basis sets with a kinetic energy cutoff of 400 eV were adopted to treat the valence electrons. Dispersion corrections were included using the Grimme-D3 method. The Brillouin zone was sampled using a Monkhorst-Pack grid with a (4×4×1) mesh. Convergence criteria were set to ensure that the energy difference per atom was below  $1.0 \times 10^{-4}$  eV and the residual force on all atoms was less than 0.05 eV/Å. The slabs were built with vacuum layer thicknesses larger than 15 Å to avoid the interaction between two periodic slabs. The adsorption energy was calculated by Eq. (Sa).

$$E_{\text{adsorption}} = E_{\text{adsorbate} + \text{reactant}} - E_{\text{Reactant}} - E_{\text{adsorbate}} \quad (\text{S1}),$$

where,  $E_{\text{adsorbate} + \text{reactant}}$  is the gross system energy of the adsorbates adsorbed on the surface, eV;  $E_{\text{Reactant}}$  and  $E_{\text{adsorbate}}$  represent energies of the surface and adsorbate, respectively, eV. In this study, The Gibbs free energy for analysis were used (by considering the entropic change and zero-point energy). The Gibbs free energies were calculated as follows:

$$G = E_e + E_{\text{ZPE}} + \Delta TS \quad (\text{S2}),$$

where  $G$  represents the Gibbs free energy,  $E_e$  represents the DFT calculated energy,  $E_{\text{ZPE}}$  represents the zero-point energy, and  $\Delta TS$  represents the entropic change.

**Ab Initio Molecular Dynamics (AIMD):** The AIMD simulation module embedded in the DS-PAW (HZWTECH, Shanghai, China) was employed, utilizing a time step of 1 fs and the NVT ensemble with the Nose-Hoover thermostat. Geometries were deemed relaxed when the forces on each atom fell below 0.05 eV/Å. Following AIMD simulations, the postprocessing program was used to obtain the mean square displacement (MSD) of the atoms. According to Fick's diffusion law:

$$J = D \frac{\Delta \mu}{\Delta r} \quad (\text{S3}),$$

where  $J$  is the diffusion flux of the reactant ( $\text{H}_2\text{O}$ ,  $\text{NH}_3\text{BH}_3$ ),  $D$  is the diffusion coefficient,  $\Delta \mu$  is the chemical potential, and  $\Delta r$  is the radial gradient of diffusion. The diffusion distance  $X$  and time  $t$  are related by:

$$X = \sqrt{Dt} \quad (\text{S4}),$$

The diffusion coefficient  $D$  was calculated from the mean square displacement (MSD) of  $\text{H}_2\text{O}$  and  $\text{NH}_3\text{BH}_3$  using:

$$D = \lim_{t \rightarrow \infty} \left( \frac{1}{2dt} \langle \vec{r}(t)^2 \rangle \right) \quad (\text{S6}),$$

Here,  $d$  is the dimension ( $d=3$ ),  $\langle \vec{r}(t)^2 \rangle$  is MSD, and  $t$  is the simulation time. Previous studies have shown that the activation energy  $E_a$  can be derived from the diffusivity-temperature plot:

$$D = D_0 e^{-\frac{\Delta H}{RT}} \quad (\text{S7}),$$

Table S1 Specific surface area and pore volume of each catalyst

| Catalysts | BET surface area (m <sup>2</sup> /g) | Pore volume (m <sup>3</sup> /g) |
|-----------|--------------------------------------|---------------------------------|
| CuCo-SG   | 5.82                                 | 0.033                           |
| CuCo-HS   | 98.26                                | 0.211                           |
| NiCo-HS   | 72.38                                | 0.119                           |
| ZnCo-HS   | 55.79                                | 0.116                           |
| MnCo-HS   | 26.88                                | 0.098                           |
| Co-HS     | 25.00                                | 0.095                           |

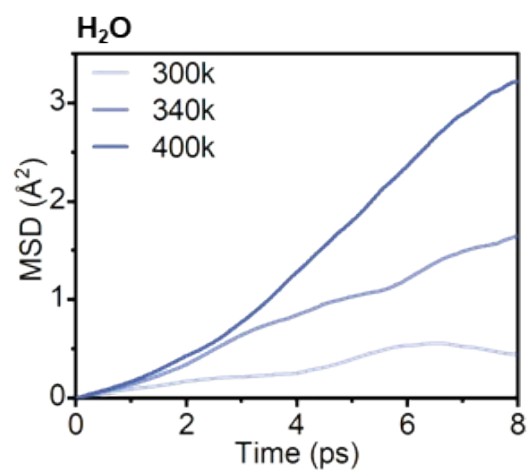

Fig. S1 Mean Squared Displacement (MSD) of H<sub>2</sub>O on Co<sub>3</sub>O<sub>4</sub> slab.

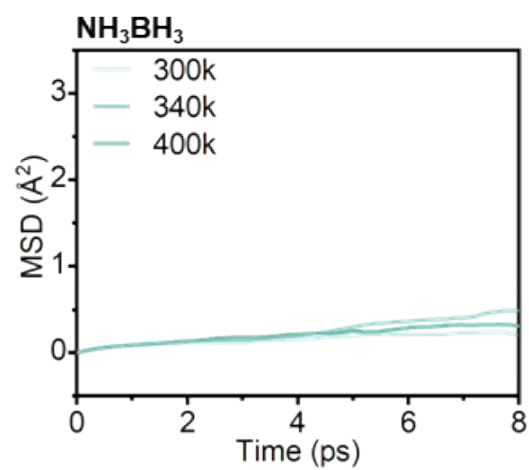

Fig. S2 Mean Squared Displacement (MSD) of NH<sub>3</sub>BH<sub>3</sub> (AB) on Co<sub>3</sub>O<sub>4</sub> slab.

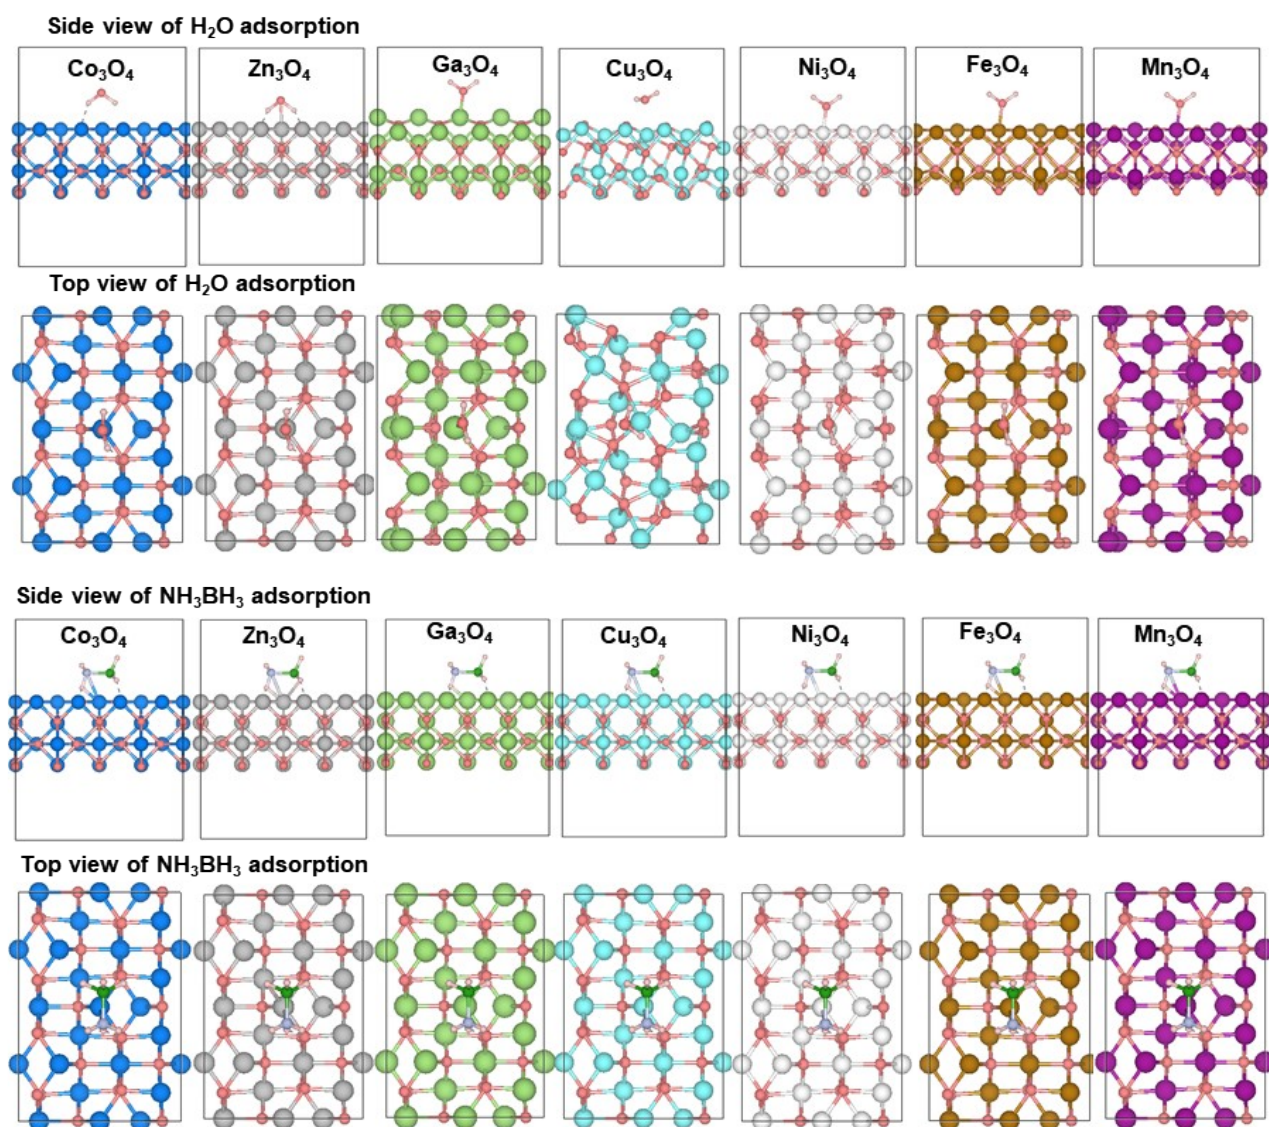

Fig. S3. The crystal slabs of M<sub>3</sub>O<sub>4</sub> (M=Co, Zn, Ga, Cu, Ni, Fe and Mn) for H<sub>2</sub>O and NH<sub>3</sub>BH<sub>3</sub> (AB).



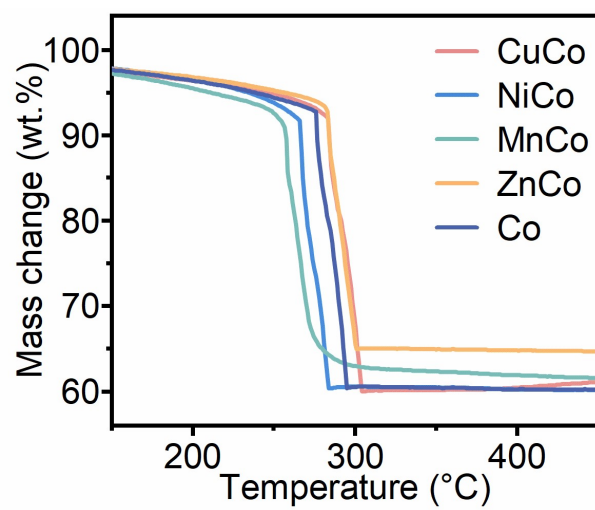

Fig. S4 Mass change of catalyst precursors during the calcination process.

**a CoCu-HS**

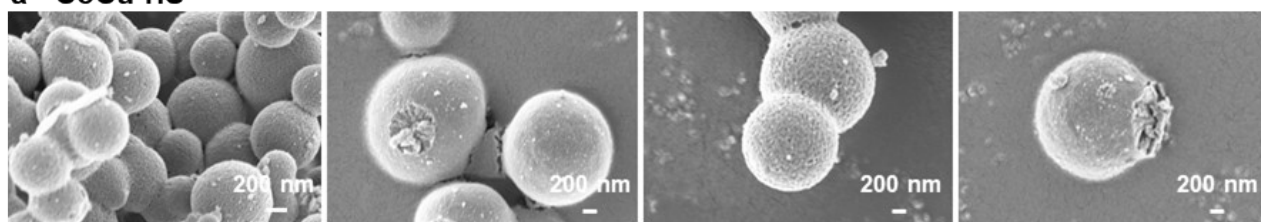

**b CoCu-SG**

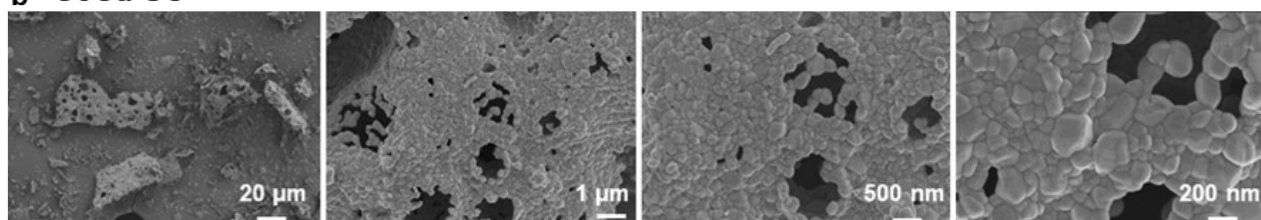

**c CoCu-HS**

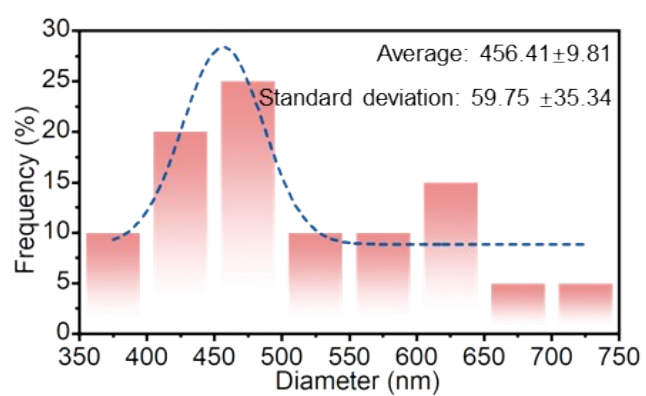

**d CoCu-SG**

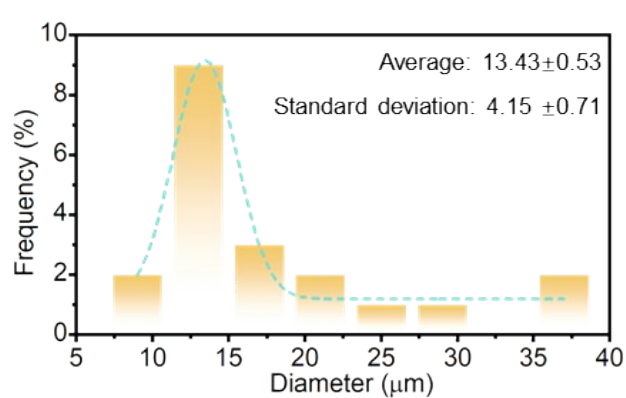

Fig. S5. High-magnification SEM images of (a) CoCu-HS and (b) CoCu-SG. The statistical analysis of the particle size distribution for (c) CoCu-HS and (d) CoCu-SG.

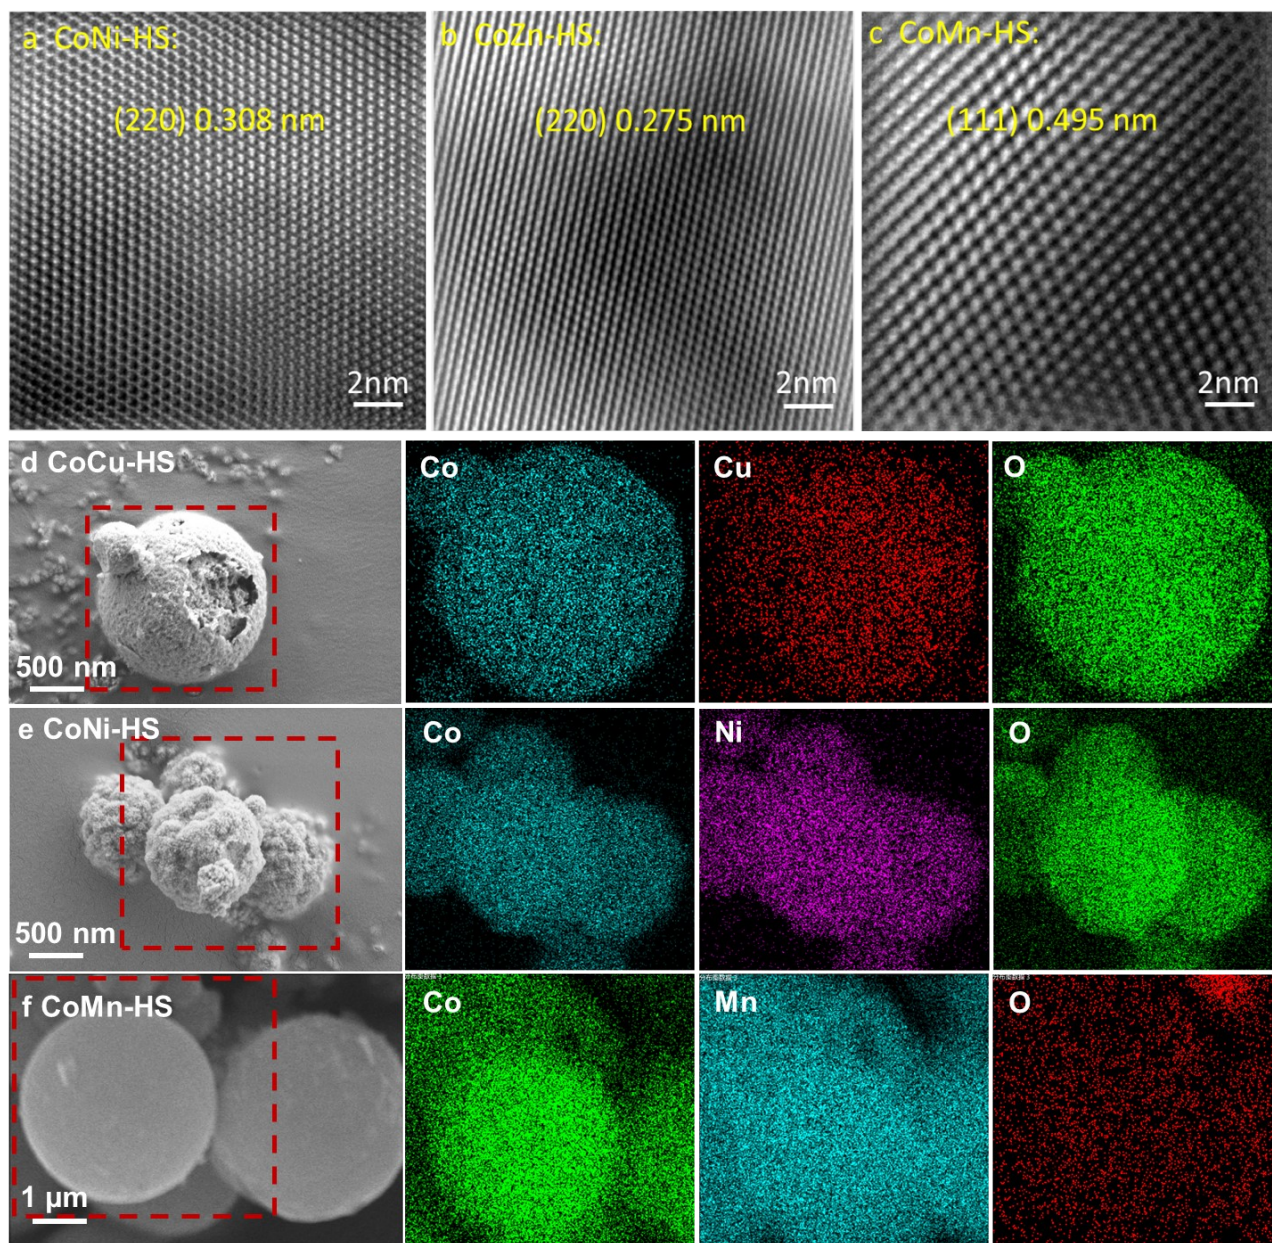

Fig. S6 SEM-EDS and HR-TEM of catalyst: Spherical morphology. (a) CoCu-HS, (b) CoNi-HS and (c) CoMn-HS. Lattice fringes (d) CoNi-HS, (e) CoZn-HS and (f) CoMn-HS.



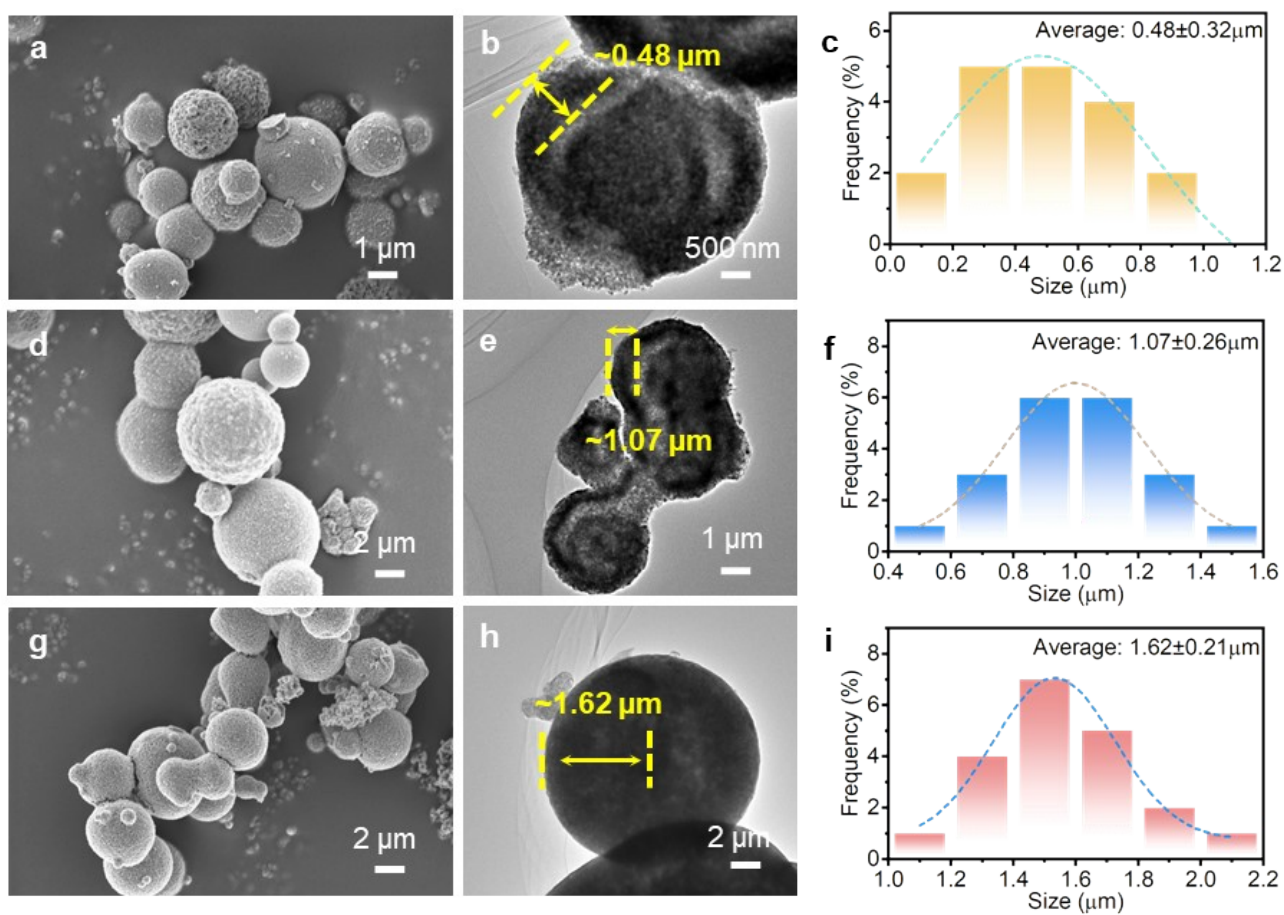

Fig. S7. Various shell thickness CoCu catalysts. (a-c)  $0.48 \pm 0.32 \mu\text{m}$ , (d-f)  $1.07 \pm 0.26 \mu\text{m}$  and (g-i)  $1.62 \pm 0.21 \mu\text{m}$ .

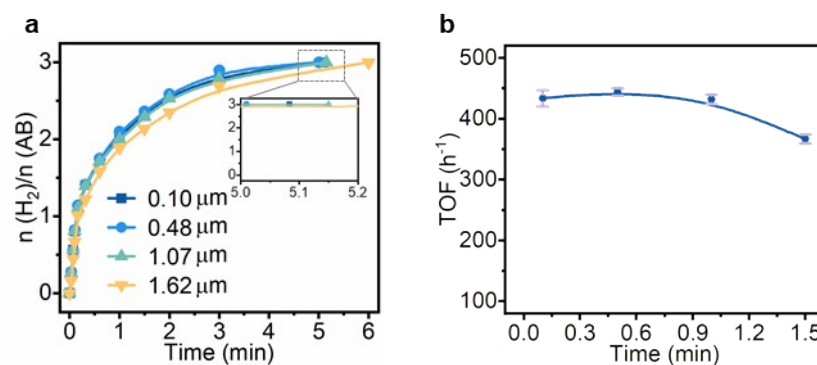

Fig. S8. Catalytic hydrolysis performance for various shell thickness CoCu catalysts: (a)  $\text{H}_2$  production curve and (b) TOF value of hydrolyzed AB in 0.5mol/L NaOH at 25°C under the action of various catalysts;

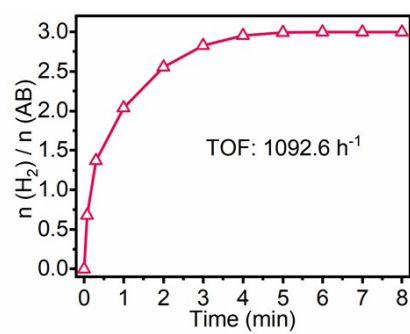

Fig. S9.  $\text{H}_2$  production curve CoCu-HS with 2 mmol of AB dissolved in 1 mol/L NaOH aqueous solution (5 mL).

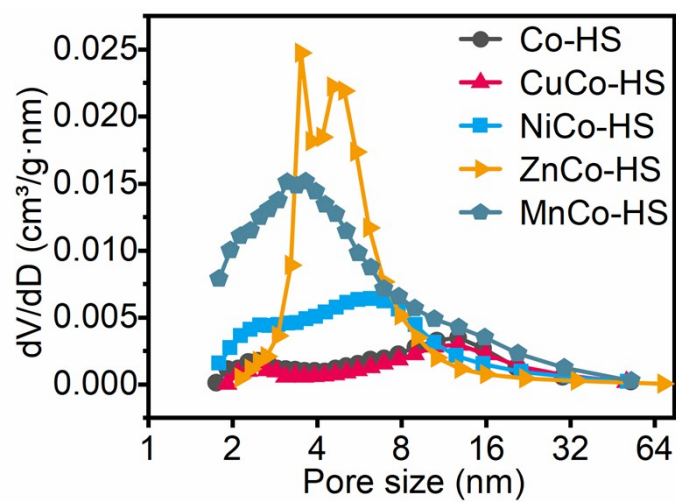

Fig. S10 Pore structure for MCo-HS (M=Cu, Ni, Zn and Mn).

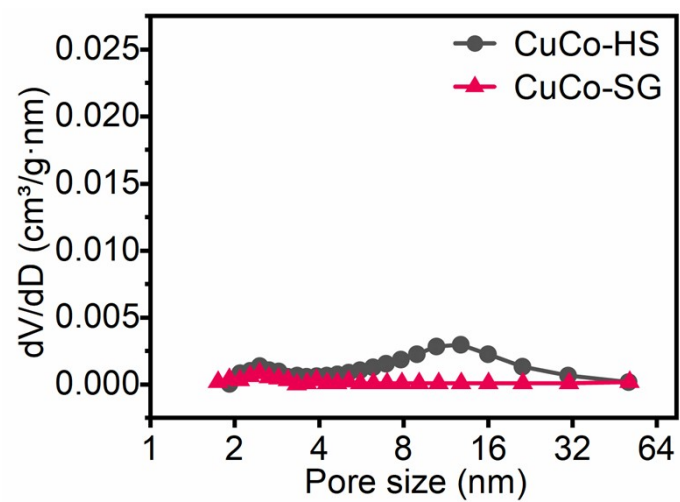

Fig. S11 Pore structure for CuCo-HS and CuCo-SG.



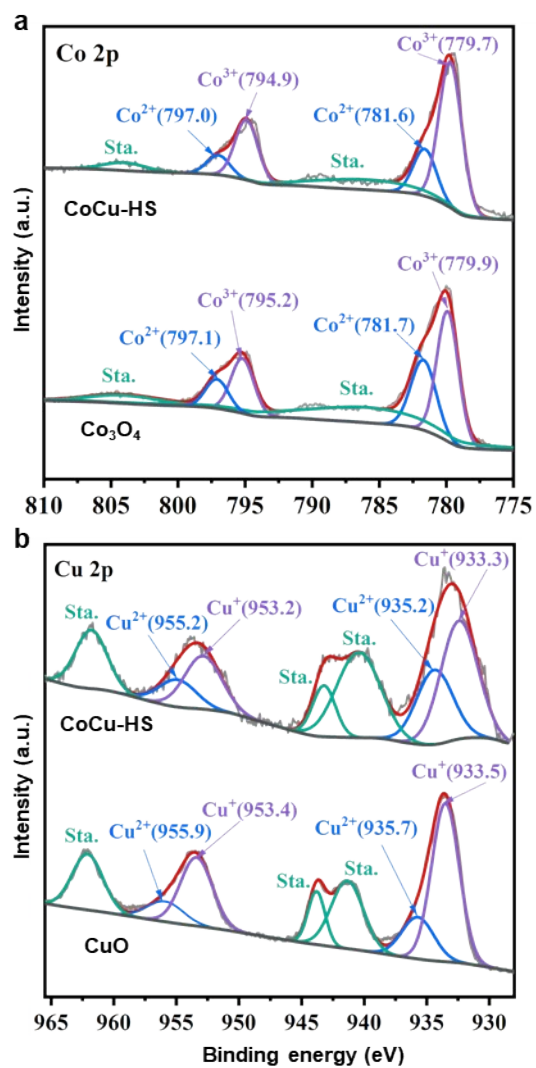

Fig. S12 XPS of (a) Co 2p spectrum and (b) Cu 2p spectrum.

**Side view**

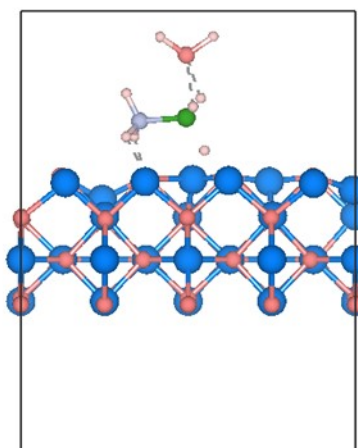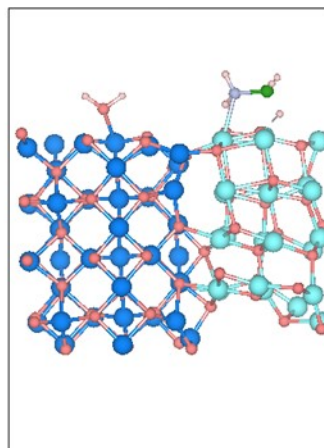

**Top view**

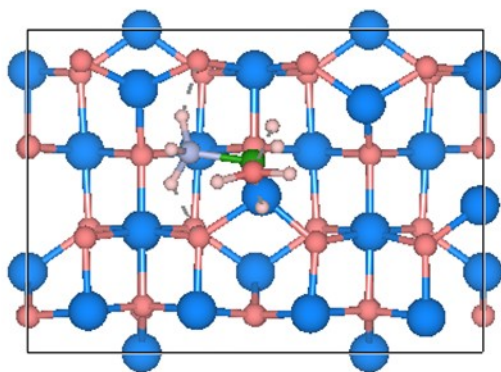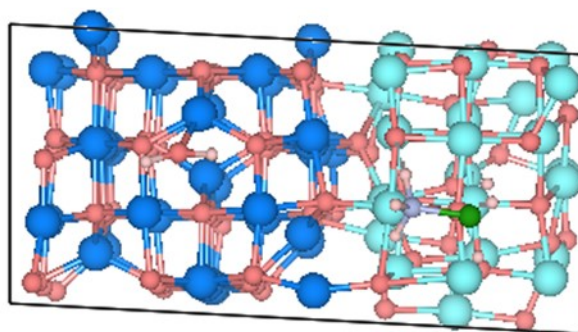

Fig. S13 Top view and side view of H<sub>2</sub>O and AB adsorption on Co<sub>3</sub>O<sub>4</sub> and CuCo-HS.

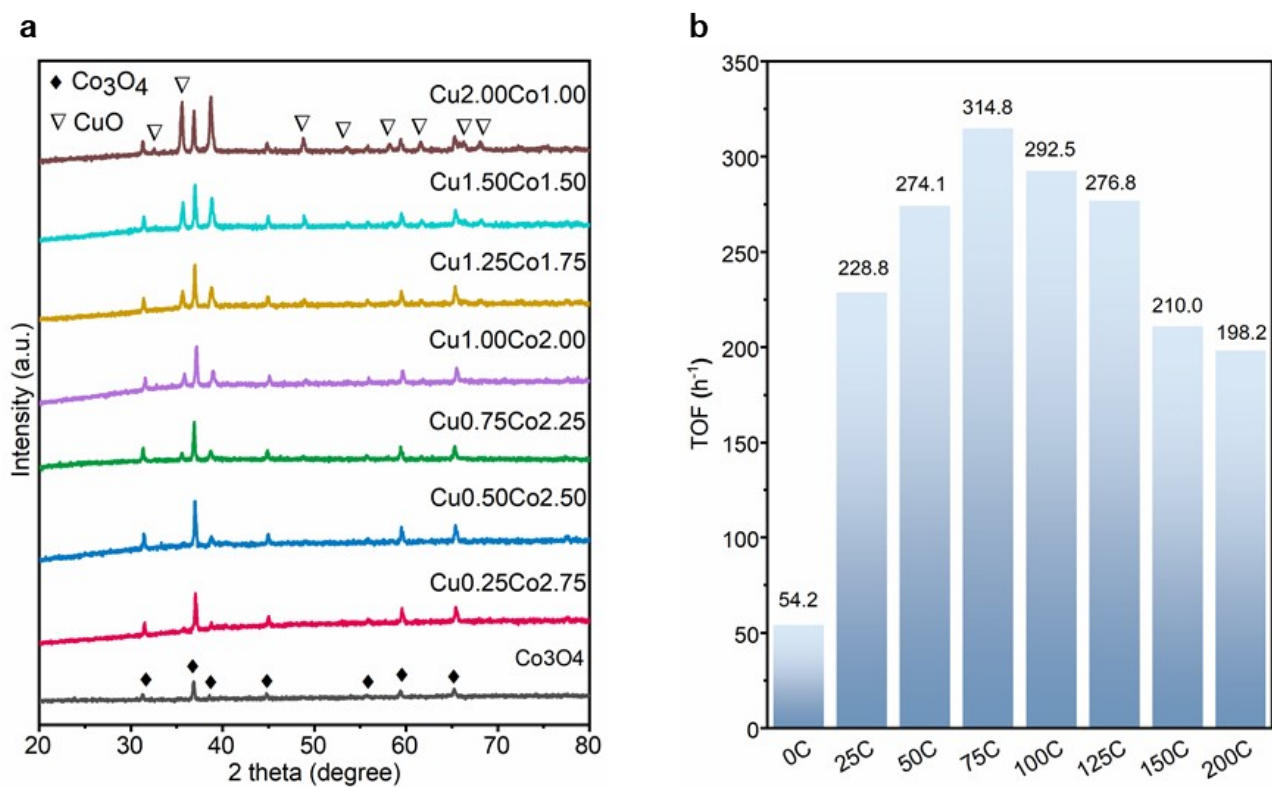

Fig. S14 Influence of different proportions of Cu on  $\text{Co}_3\text{O}_4$  catalyst: (a) Phase compositions and (b) TOF values.
